# Supplementary material for: Confined nanospace pyrolysis for synthesis of N-doped few-layer graphene-supported yolk–shell carbon hollow spheres for electrochemical sensing
Source: Royal Society of Chemistry journal article supplement (doi:10.1039/c5ra04961j), 2015-01-01
Supplement: c5ra04961j1.pdf [file c5ra04961j1.pdf]

## Supporting Information

Confined nanospace pyrolysis for synthesis of N-doped few-layer graphene-supported yolk-shell carbon hollow spheres for electrochemical sensing

Sen Liu,<sup>a</sup> Yong Zhang,<sup>a</sup> Ziyang Wang,<sup>a</sup> Bo Yu,<sup>a</sup> Shenguan Song,<sup>a</sup> and Tong Zhang<sup>\*a,b</sup>

<sup>a</sup> State Key Laboratory on Integrated Optoelectronics, College of Electronic Science and Engineering, Jilin University, Changchun 130012, P. R. China

<sup>b</sup> State Key Laboratory of Transducer Technology, Chinese Academy of Sciences, P. R. China

\*Corresponding author:

E-mail address: zhangtong@jlu.edu.cn (T. Zhang)

Tel.: +86 431 85168385; Fax: +86 431 85168270.

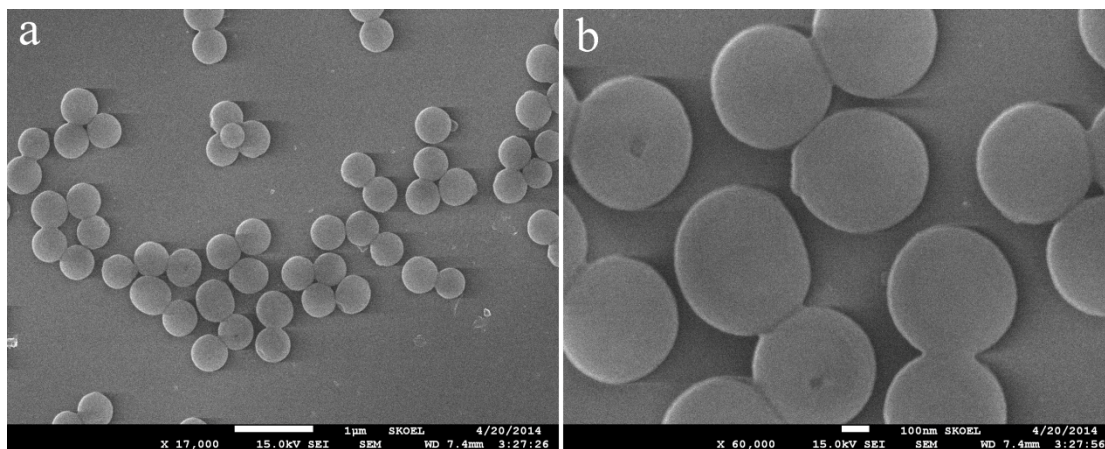

**Fig. S1** (a) Low and (b) high magnification SEM images of PPy particles thus obtained.

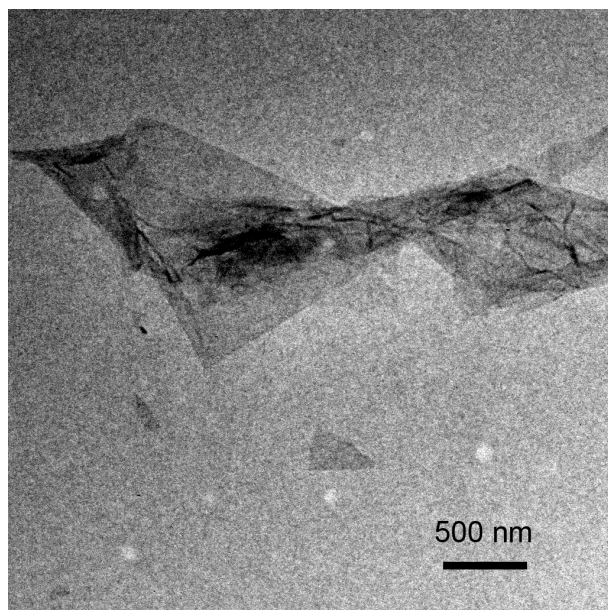

**Fig. S2** TEM image of GO.

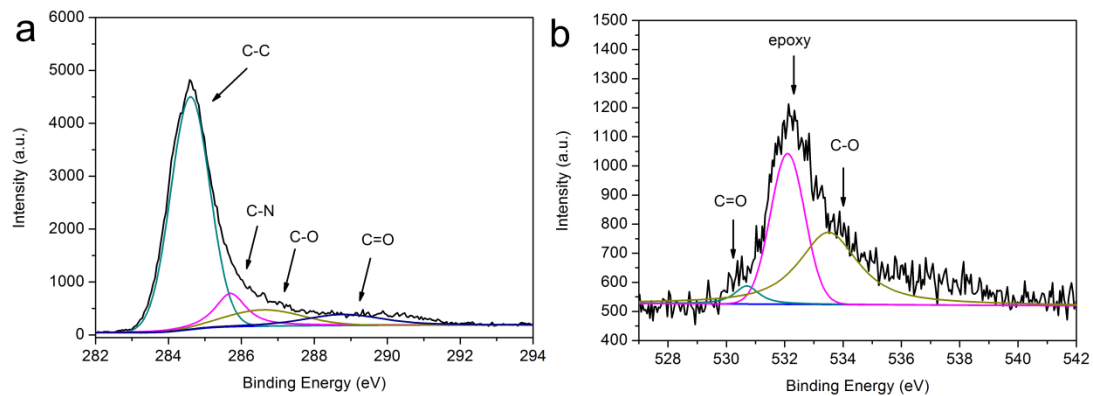

**Fig. S3** (a) The C1s and (b) O1s spectra of CHSs/N-G hybrids.

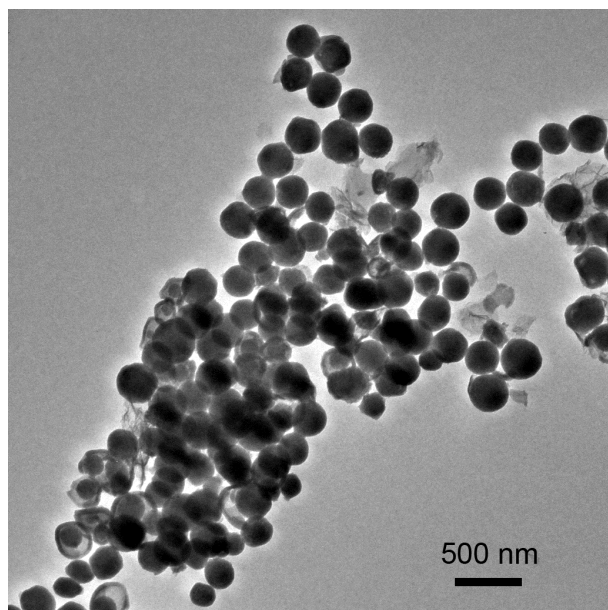

**Fig. S4** TEM image of CHSs/N-G prepared by pyrolysis of PPy-GO hybrids at 700 °C for 4 h.

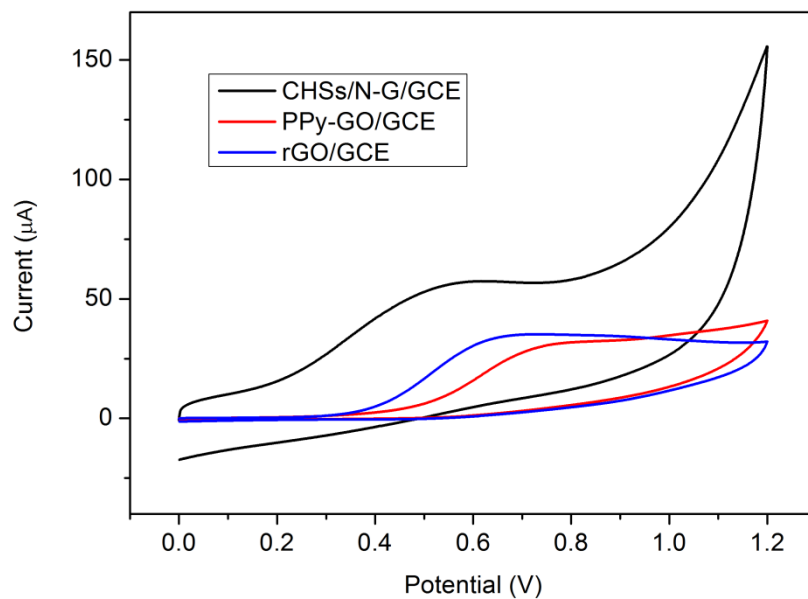

**Fig. S5** Cyclic voltammeters (CVs) of CHSs/N-G/GCE, PPy-GO/GCE and rGO/GCE in 0.1 M PBS at pH 7.0 in the presence of 5.0 mM L-cysteine (scan rate: 0.05 V/s).

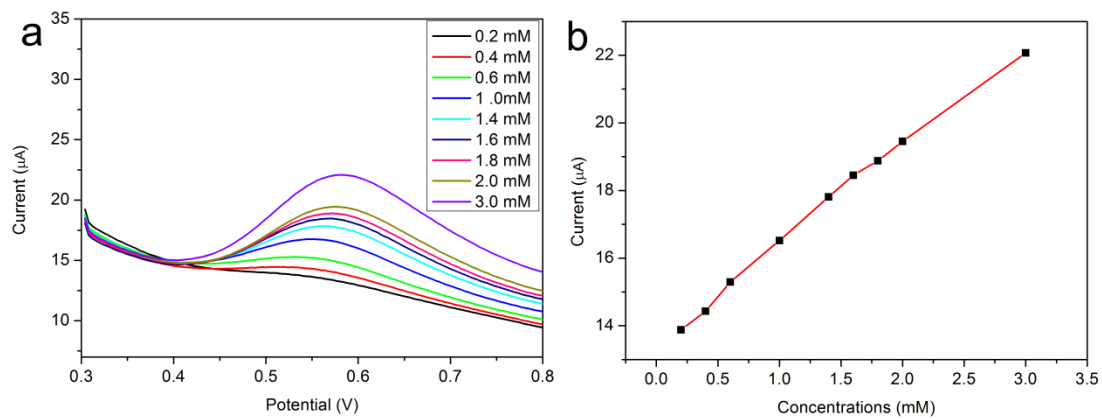

**Fig. S6** (a) DPVs at CHSs/N-G/GCE in 0.1 M PBS (pH 7.0) in the presence of 0.2, 0.4, 0.6, 1.0, 1.4, 1.6, 1.8, 2.0, and 3.0 mM L-cysteine, and (b) corresponding calibration plot of the concentration of L-cysteine versus peak current.
